# Supplementary material for: Complexity of Medication Regimens for Children With Neurological Impairment
Source: PubMed Central journal article supplement (PMC8391103; doi:10.1001/jamanetworkopen.2021.22818), 2021-08-26
Supplement: jamanetwopen-e2122818-s001.pdf [file jamanetwopen-e2122818-s001.pdf]

## Supplemental Online Content

Feinstein JA, Friedman H, Orth LE, et al. Complexity of medication regimens for children with neurological impairment. *JAMA Netw Open*. 2021;4(8):e2122818. doi:10.1001/jamanetworkopen.2021.22818

**eTable.** Medications Used by MRCI Tertile in Children With Severe Neurological Impairment

This supplemental material has been provided by the authors to give readers additional information about their work.

**eTable. Medications Used by MRCI Tertile in Children With Severe Neurological Impairment**

| <b>Generic Name</b>            | <b>% of Patients in Low MRCI Tertile Using Medication (N=41)</b> | <b>% of Patients in Medium MRCI Tertile Using Medication (N=41)</b> | <b>% of Patients in High MRCI Tertile Using Medication (N=41)</b> |
|--------------------------------|------------------------------------------------------------------|---------------------------------------------------------------------|-------------------------------------------------------------------|
| acetazolamide                  | 4.9                                                              | 4.9                                                                 | 0.0                                                               |
| acetylsalicylic acid           | 4.9                                                              | 4.9                                                                 | 7.3                                                               |
| alpha-d-galactosidase          | 0.0                                                              | 0.0                                                                 | 2.4                                                               |
| amantadine                     | 2.4                                                              | 0.0                                                                 | 0.0                                                               |
| amfetamine                     | 2.4                                                              | 4.9                                                                 | 0.0                                                               |
| aminocaproic acid              | 0.0                                                              | 7.3                                                                 | 0.0                                                               |
| amitriptyline                  | 2.4                                                              | 4.9                                                                 | 4.9                                                               |
| amlodipine                     | 0.0                                                              | 2.4                                                                 | 0.0                                                               |
| amoxicillin                    | 2.4                                                              | 0.0                                                                 | 7.3                                                               |
| amoxicillin and beta-lactamase | 0.0                                                              | 4.9                                                                 | 0.0                                                               |
| anakinra                       | 0.0                                                              | 0.0                                                                 | 2.4                                                               |
| aripiprazole                   | 0.0                                                              | 2.4                                                                 | 2.4                                                               |
| ascorbic acid                  | 0.0                                                              | 7.3                                                                 | 7.3                                                               |
| atropine                       | 0.0                                                              | 0.0                                                                 | 2.4                                                               |
| azelastine                     | 7.3                                                              | 4.9                                                                 | 0.0                                                               |
| azithromycin                   | 4.9                                                              | 4.9                                                                 | 4.9                                                               |
| bacitracin                     | 4.9                                                              | 0.0                                                                 | 2.4                                                               |
| baclofen                       | 14.6                                                             | 19.5                                                                | 14.6                                                              |
| beclometasone                  | 7.3                                                              | 2.4                                                                 | 0.0                                                               |
| benzethonium                   | 0.0                                                              | 2.4                                                                 | 0.0                                                               |
| benzocaine                     | 0.0                                                              | 2.4                                                                 | 0.0                                                               |
| benzonatate                    | 0.0                                                              | 0.0                                                                 | 2.4                                                               |
| betamethasone                  | 0.0                                                              | 2.4                                                                 | 0.0                                                               |
| bethanechol                    | 2.4                                                              | 0.0                                                                 | 0.0                                                               |
| bioflavonoids                  | 2.4                                                              | 0.0                                                                 | 0.0                                                               |
| bisacodyl                      | 2.4                                                              | 4.9                                                                 | 4.9                                                               |
| bosentan                       | 0.0                                                              | 0.0                                                                 | 2.4                                                               |
| budesonide                     | 7.3                                                              | 4.9                                                                 | 7.3                                                               |
| buprenorphine                  | 2.4                                                              | 0.0                                                                 | 0.0                                                               |
| calcium compounds              | 12.2                                                             | 2.4                                                                 | 4.9                                                               |
| cannabidiol                    | 2.4                                                              | 2.4                                                                 | 0.0                                                               |
| captopril                      | 0.0                                                              | 4.9                                                                 | 0.0                                                               |
| carbidopa                      | 0.0                                                              | 2.4                                                                 | 0.0                                                               |
| carbidopa-levodopa             | 0.0                                                              | 2.4                                                                 | 0.0                                                               |
| cefalexin                      | 2.4                                                              | 0.0                                                                 | 0.0                                                               |

|                    |      |      |      |
|--------------------|------|------|------|
| cefdinir           | 0.0  | 2.4  | 0.0  |
| ceftriaxone        | 0.0  | 0.0  | 2.4  |
| celecoxib          | 0.0  | 2.4  | 0.0  |
| cetirizine         | 39.0 | 26.8 | 31.7 |
| chlorhexidine      | 0.0  | 0.0  | 2.4  |
| chlorothiazide     | 0.0  | 7.3  | 0.0  |
| cholestyramine     | 0.0  | 0.0  | 4.9  |
| ciclesonide        | 0.0  | 2.4  | 2.4  |
| citalopram         | 4.9  | 2.4  | 2.4  |
| clindamycin        | 4.9  | 7.3  | 4.9  |
| clobazam           | 17.1 | 12.2 | 17.1 |
| clobetasol         | 0.0  | 4.9  | 0.0  |
| clonazepam         | 12.2 | 12.2 | 19.5 |
| clonidine          | 24.4 | 9.8  | 19.5 |
| clotrimazole       | 0.0  | 4.9  | 2.4  |
| colecalfiferol     | 14.6 | 24.4 | 24.4 |
| colistimethate     | 0.0  | 0.0  | 4.9  |
| crisaborole        | 0.0  | 2.4  | 0.0  |
| cyclobenzaprine    | 0.0  | 4.9  | 0.0  |
| cyproheptadine     | 2.4  | 12.2 | 19.5 |
| dantrolene         | 0.0  | 0.0  | 2.4  |
| desmopressin       | 2.4  | 2.4  | 2.4  |
| desonide           | 14.6 | 14.6 | 14.6 |
| dexamethasone      | 2.4  | 0.0  | 2.4  |
| dexmethylphenidate | 7.3  | 0.0  | 0.0  |
| diazepam           | 39.0 | 46.3 | 48.8 |
| diclofenac         | 7.3  | 4.9  | 7.3  |
| dicyclomine        | 0.0  | 7.3  | 2.4  |
| diethyltoluamide   | 2.4  | 0.0  | 0.0  |
| dihydroergotamine  | 0.0  | 2.4  | 0.0  |
| dimethicone        | 0.0  | 2.4  | 0.0  |
| dimetindene        | 0.0  | 2.4  | 0.0  |
| diphenhydramine    | 7.3  | 9.8  | 14.6 |
| docusate sodium    | 7.3  | 4.9  | 12.2 |
| dornase alfa       | 4.9  | 2.4  | 0.0  |
| doxepin            | 2.4  | 0.0  | 0.0  |
| duloxetine         | 2.4  | 0.0  | 0.0  |
| enoxaparin         | 2.4  | 0.0  | 2.4  |
| epinephrine        | 9.8  | 12.2 | 9.8  |
| ergocalciferol     | 0.0  | 2.4  | 0.0  |
| erythromycin       | 7.3  | 0.0  | 7.3  |

|                        |      |      |      |
|------------------------|------|------|------|
| escitalopram           | 4.9  | 0.0  | 0.0  |
| famotidine             | 4.9  | 9.8  | 2.4  |
| fexofenadine           | 4.9  | 2.4  | 4.9  |
| fludrocortisone        | 4.9  | 0.0  | 4.9  |
| fluocinolone acetonide | 7.3  | 4.9  | 4.9  |
| fluocinonide           | 2.4  | 12.2 | 7.3  |
| fluoxetine             | 2.4  | 0.0  | 2.4  |
| fluticasone            | 70.7 | 68.3 | 63.4 |
| folic acid             | 0.0  | 2.4  | 0.0  |
| furosemide             | 0.0  | 2.4  | 7.3  |
| gabapentin             | 14.6 | 9.8  | 9.8  |
| gentamicin             | 0.0  | 2.4  | 0.0  |
| ginger-fennel          | 0.0  | 0.0  | 2.4  |
| glycopyrronium bromide | 0.0  | 7.3  | 14.6 |
| guaifenesin            | 2.4  | 0.0  | 0.0  |
| guanfacine             | 4.9  | 7.3  | 4.9  |
| hydrochlorothiazide    | 0.0  | 4.9  | 0.0  |
| hydrocortisone         | 22.0 | 22.0 | 19.5 |
| hydroxychloroquine     | 2.4  | 0.0  | 0.0  |
| hydroxyzine            | 9.8  | 2.4  | 12.2 |
| hyoscyamine            | 2.4  | 0.0  | 2.4  |
| ibuprofen              | 22.0 | 22.0 | 9.8  |
| imipramine             | 2.4  | 0.0  | 0.0  |
| ipratropium bromide    | 2.4  | 7.3  | 31.7 |
| iron bivalent          | 34.1 | 22.0 | 24.4 |
| isotretinoin           | 0.0  | 0.0  | 2.4  |
| ketoconazole           | 4.9  | 4.9  | 0.0  |
| ketotifen              | 0.0  | 4.9  | 0.0  |
| lacosamide             | 7.3  | 4.9  | 2.4  |
| lactulose              | 4.9  | 2.4  | 2.4  |
| lamotrigine            | 9.8  | 4.9  | 0.0  |
| lansoprazole           | 9.8  | 7.3  | 22.0 |
| levetiracetam          | 19.5 | 22.0 | 9.8  |
| levocarnitine          | 17.1 | 4.9  | 4.9  |
| levocetirizine         | 2.4  | 2.4  | 0.0  |
| levonorgestrel         | 0.0  | 2.4  | 0.0  |
| levothyroxine sodium   | 9.8  | 9.8  | 2.4  |
| lidocaine              | 9.8  | 7.3  | 12.2 |
| lidocaine-prilocaine   | 0.0  | 4.9  | 4.9  |
| lisinopril             | 0.0  | 2.4  | 0.0  |
| loperamide             | 2.4  | 0.0  | 2.4  |

|                                      |      |      |      |
|--------------------------------------|------|------|------|
| loratadine                           | 4.9  | 7.3  | 4.9  |
| lorazepam                            | 2.4  | 7.3  | 4.9  |
| macrogol                             | 75.6 | 56.1 | 46.3 |
| magnesium compounds                  | 14.6 | 26.8 | 12.2 |
| melatonin                            | 46.3 | 22.0 | 26.8 |
| meloxicam                            | 2.4  | 0.0  | 2.4  |
| menthol-zinc                         | 14.6 | 9.8  | 9.8  |
| methylphenidate                      | 9.8  | 2.4  | 0.0  |
| methylprednisolone                   | 0.0  | 0.0  | 7.3  |
| metronidazole                        | 0.0  | 2.4  | 2.4  |
| miconazole                           | 7.3  | 2.4  | 9.8  |
| midazolam                            | 34.1 | 22.0 | 22.0 |
| midodrine                            | 0.0  | 0.0  | 2.4  |
| mirtazapine                          | 2.4  | 0.0  | 2.4  |
| mometasone                           | 17.1 | 14.6 | 17.1 |
| montelukast                          | 29.3 | 31.7 | 24.4 |
| multienzymes (lipase, protease etc.) | 4.9  | 0.0  | 2.4  |
| multivitamins, plain                 | 56.1 | 36.6 | 24.4 |
| mupirocin                            | 4.9  | 7.3  | 9.8  |
| mycophenolic acid                    | 0.0  | 2.4  | 0.0  |
| naproxen                             | 4.9  | 4.9  | 0.0  |
| neomycin-bacitracin-polymyxin        | 2.4  | 2.4  | 4.9  |
| nystatin                             | 14.6 | 24.4 | 31.7 |
| ofloxacin                            | 2.4  | 0.0  | 4.9  |
| olanzapine                           | 2.4  | 0.0  | 0.0  |
| olopatadine                          | 2.4  | 17.1 | 12.2 |
| omeprazole                           | 22.0 | 14.6 | 9.8  |
| ondansetron                          | 26.8 | 26.8 | 29.3 |
| oxcarbazepine                        | 4.9  | 4.9  | 2.4  |
| oxybutynin                           | 4.9  | 2.4  | 2.4  |
| oxycodone                            | 0.0  | 7.3  | 7.3  |
| oxygen                               | 26.8 | 26.8 | 41.5 |
| oxymetazoline                        | 2.4  | 2.4  | 0.0  |
| palivizumab                          | 2.4  | 2.4  | 0.0  |
| paracetamol                          | 29.3 | 43.9 | 19.5 |
| pentamidine                          | 0.0  | 0.0  | 2.4  |
| phenazopyridine                      | 0.0  | 2.4  | 0.0  |
| phenobarbital                        | 0.0  | 9.8  | 4.9  |
| phenylephrine-bromphen-dm            | 2.4  | 0.0  | 0.0  |
| potassium                            | 9.8  | 4.9  | 7.3  |
| prednisolone                         | 0.0  | 7.3  | 9.8  |

|                             |      |      |       |
|-----------------------------|------|------|-------|
| prednisone                  | 0.0  | 4.9  | 0.0   |
| pregabalin                  | 2.4  | 0.0  | 0.0   |
| prochlorperazine            | 2.4  | 7.3  | 2.4   |
| progestogens and estrogens  | 9.8  | 7.3  | 7.3   |
| promethazine                | 0.0  | 2.4  | 4.9   |
| propranolol                 | 4.9  | 0.0  | 0.0   |
| pyridoxine (vit b6)         | 2.4  | 4.9  | 2.4   |
| quetiapine                  | 7.3  | 2.4  | 4.9   |
| ramelteon                   | 0.0  | 4.9  | 0.0   |
| ranitidine                  | 31.7 | 19.5 | 14.6  |
| risperidone                 | 12.2 | 0.0  | 2.4   |
| rivaroxaban                 | 0.0  | 2.4  | 0.0   |
| rizatriptan                 | 7.3  | 7.3  | 2.4   |
| rufinamide                  | 4.9  | 4.9  | 0.0   |
| salbutamol                  | 97.6 | 90.2 | 100.0 |
| scopolamine                 | 2.4  | 4.9  | 4.9   |
| senna glycosides            | 17.1 | 19.5 | 17.1  |
| sertraline                  | 9.8  | 4.9  | 0.0   |
| sildenafil                  | 7.3  | 12.2 | 2.4   |
| sirolimus                   | 0.0  | 2.4  | 0.0   |
| sodium bicarbonate          | 0.0  | 2.4  | 0.0   |
| sodium chloride, hypertonic | 14.6 | 14.6 | 29.3  |
| sodium citrate              | 4.9  | 2.4  | 2.4   |
| somatropin                  | 4.9  | 7.3  | 2.4   |
| spironolactone              | 0.0  | 0.0  | 2.4   |
| stiripentol                 | 0.0  | 2.4  | 0.0   |
| sucrafate                   | 2.4  | 0.0  | 2.4   |
| sulfasalazine               | 0.0  | 2.4  | 0.0   |
| sumatriptan                 | 0.0  | 7.3  | 2.4   |
| tacrolimus                  | 0.0  | 7.3  | 0.0   |
| tadalafil                   | 2.4  | 2.4  | 2.4   |
| testosterone                | 2.4  | 0.0  | 0.0   |
| thiamine (vit b1)           | 2.4  | 0.0  | 0.0   |
| tiotropium bromide          | 0.0  | 2.4  | 0.0   |
| tizanidine                  | 2.4  | 4.9  | 0.0   |
| tobramycin                  | 0.0  | 0.0  | 2.4   |
| topiramate                  | 7.3  | 7.3  | 7.3   |
| tramadol                    | 4.9  | 2.4  | 0.0   |
| tranexamic acid             | 0.0  | 2.4  | 0.0   |
| trazodone                   | 14.6 | 12.2 | 9.8   |
| tretinoin                   | 4.9  | 0.0  | 0.0   |

|                 |      |      |      |
|-----------------|------|------|------|
| triamcinolone   | 34.1 | 26.8 | 24.4 |
| trihexyphenidyl | 0.0  | 0.0  | 2.4  |
| valproic acid   | 7.3  | 7.3  | 2.4  |
| venlafaxine     | 0.0  | 2.4  | 0.0  |
| vigabatrin      | 2.4  | 0.0  | 2.4  |
| vitamin         | 2.4  | 0.0  | 0.0  |
| vitamin k       | 0.0  | 2.4  | 0.0  |
| warfarin        | 0.0  | 4.9  | 0.0  |
| zinc            | 2.4  | 2.4  | 14.6 |
| zonisamide      | 4.9  | 4.9  | 4.9  |
